# Supplementary material
Source: Springer Nature journal article supplement (https://www.springermedizin.de/resource/supplementary/12957_2012_1048_MOESM2_ESM.pdf/9562224)

**A**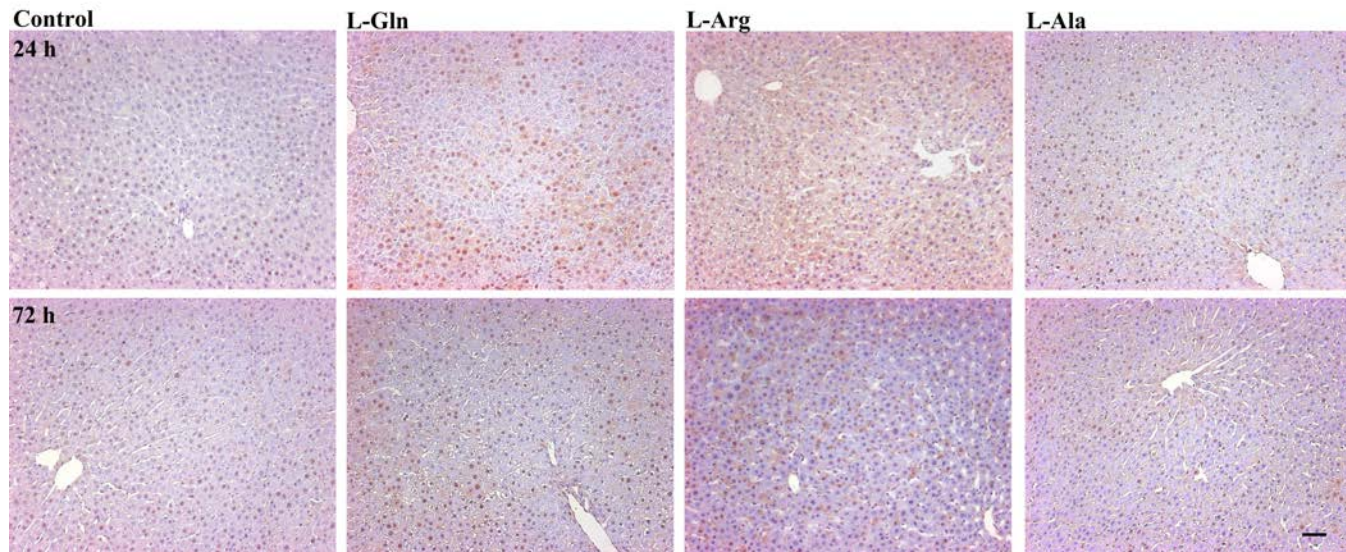**B****B**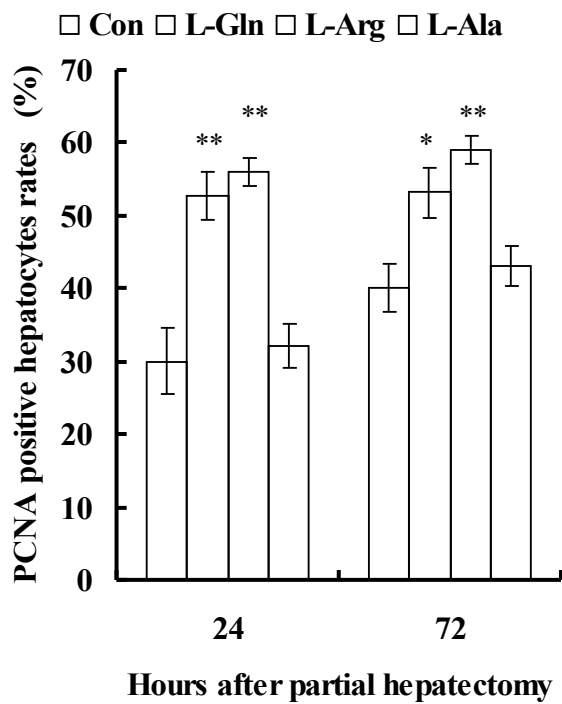

Supplement: MOESM2 [file 9562224]
